# Supplementary material for: Adaptation of an integrated Behavioural Activation and physical activity intervention for women with depression and type 2 diabetes mellitus in Pakistan
Source: Research Square preprint supplement (doi:10.21203/rs.3.rs-7480009/v1), 2025-10-03
Supplement: Supplementary file 1 [file 19501665af2572783cb1b03b.docx]

**Supplementary file 2: Constraints and enablers within the domains of the Bernal cultural adaptation framework to deliver integrated Behavioural Activation and physical activity (BAcPAc) intervention to women with depression and type 2 diabetes mellitus in Pakistan**

| **Domain** | **Constraints** | **Enablers/possible solutions** |
| --- | --- | --- |
| **Language** | - Only a limited population can understand the English language - Difficulty in understanding the terms and jargon in the English language (even educated people face difficulties in understanding English terms) | - Translate the intervention contents into Urdu language (understanding written Urdu language is much easier compared to other written local languages) - Feasibility of using layman’s language |
| **Persons (patient and therapist)** | - Preference of women patients and their carers towards female therapists - A more negative attitude towards other healthcare staff compared to the treating physician | - Involve family members in the interactions between patient and therapist - Participants to receive initial verbal and/or written description and referral from the treating physician |
| **Metaphors** | - The original intervention did not include symbols or visuals in the self-help workbook | - Possibility to provide symbols for guidance of patients and their carers |
| **Content (narrative, characters, illustrations)** | - Content is primarily focused on depression among people (both men and women) living in the UK - The case studies, activities, images, and illustrations are not appropriate for women in Pakistan - Difficulties in studying and understanding lengthy written scripts, instructions, and explanations - Visual scale from 0 to 6 was used to evaluate difficulties in performing activities which may be a scale range that participants struggle to understand | - Revise content to focus on women with depression and T2DM living in Pakistan - Develop case studies specific to our settings - Cultural and religious-specific activities should be added - Add images and illustrations instead of written text where possible - Add a visual scale from 0 to 10 to evaluate difficulties in performing activities. It will be easier for patients to provide a rating on a 0 to 10 visual scale. |
| **Concepts** | - Patients and their carers often have limited awareness about the effects of physical activity on mental health | - Patients and their carers are aware of the positive effects of physical activity on physical health (weight loss, body appearance, general health) |
| **Goals** | - The goal of the BAcPAc intervention was to promote physical activity and reduce depressive symptoms because the target population was people with depression | - We aim to use the intervention to promote physical activity and manage both depressive symptoms and blood glucose levels because the target population will be people with depression and T2DM |
| **Methods** | - Mental health workers are not available in diabetes care facilities - Difficulties in visiting healthcare facilities for treatment sessions - Patients may not be able to complete their worksheets without assistance | - Train non-mental health specialists on the intervention - Follow-up for intervention sessions needs to be scheduled alongside follow-up for diabetic check-ups/medication. Follow-up sessions need to be flexible to accommodate patient needs - Involvement of family members to facilitate the patient throughout the intervention period |
| **Context** | - Patients will be dependent on carers as generally women do not travel alone and need permission from their husbands/any other male family member to attend sessions. Moreover, women generally do not make treatment-related decisions without the involvement of family members | - Therapist meeting with carers/family members. Carers can support therapists in the successful delivery of the intervention |
