# Supplementary material for: Adaptation of an integrated Behavioural Activation and physical activity intervention for women with depression and type 2 diabetes mellitus in Pakistan
Source: Research Square preprint supplement (doi:10.21203/rs.3.rs-7480009/v1), 2025-10-03
Supplement: Supplementary file 2 [file a1c100e9b8e8401f94a5b820.docx]

**Supplementary file 3: Mapping changes made to integrated Behavioural Activation and physical activity (BAcPAc) intervention as per Adaptation Matrix from Stirman Adaptation Classification**

| **Description of the original BAcPAc intervention contents** | **Description of the adapted intervention content** | **Level of adaptation*** | **Type of adaptation*** |
| --- | --- | --- | --- |
| ***Content modifications: changes made to the intervention procedures, materials, or delivery*** | | | |
| Curricula and components: inclusion or exclusion of elements | | | |
| The intervention was designed for adults with depression only | We added information about diabetes along with depression, where needed | 2 | 6 |
| Contextual examples of activities relevant to people in the UK | We changed the examples of activities to be culturally relevant. We focused on activities that are commonly performed by women in Pakistan | 3 | 1 |
| Change in pictures or illustrations | | | |
| The pictures included were of people from the UK | We included anonymized pictures of women presented in the local context | 3 | 1 |
| There were few pictures on the initial pages of the booklet illustrating only some of the activities | We incorporated some additional pictures to illustrate the activities pictorially | 3 | 1,2,5 |
| Visual scale from 0 to 6 to evaluate difficulties in performing activities | We replaced it with a visual scale from 0 to 10 to evaluate difficulties in performing activities | 3 | 1 |
| Intervention dose | | | |
| One assessment session, followed by 12 support sessions. Each session of 25 to 35 minutes | One assessment session followed by 5 support sessions. Each session of 30 to 45 minutes | 3 | 1,4,7 |
| ***Contextual modifications: modifications to the format or channel, the setting or location in which the overall intervention is delivered, or the personnel who deliver the intervention*** | | | |
| Inclusion and exclusion criteria | | | |
| Individuals with depression living in the UK | Women with depression and type 2 diabetes mellitus living in Pakistan | 3 | Not applicable |
| Intervention delivery | | | |
| The intervention manual is lengthy with most of the instructions in written format | Self-help materials are briefer with increased input from the therapists. Where possible, written text is replaced with images and illustrations | 4,5 | 2,3,4,5,7 |
| Instructions about family/friend support were mentioned only a few times | Throughout the adapted intervention, a stronger social support component is advised to ask patients to involve family members | 3 | 2 |
| The intervention was delivered by trained psychological well-being practitioners who completed an accredited psychological well-being practitioner training programme | The intervention will be delivered by non-mental health specialists working in diabetes care services.  Initial verbal/written description and referral to the intervention will be provided by the treating physician | 4 | Not applicable |
| ***Modifications to the training and evaluation process*** | | | |
| Training (changes made to the training of personnel) | | | |
| Trained psychological well-being practitioners received an additional one-day training | Non-mental health specialists will receive 3 days of face-to-face training | 4 | 2,5,6,7 |
| Evaluation measures | | | |
| Physical activity and depression were the main outcomes | In addition to physical activity and depression, we will also evaluate glycaemic control. Moreover, after the treatment, we will also evaluate activities in which patients face difficulties at the start of the treatment. | 2 | 2,5 |
| **Stirman levels and types of adaptation**  **Level of adaptation**  1. Individual recipient level: The intervention is modified for a particular recipient (e.g., simplifying language if a patient has cognitive impairment or if language barriers exist; changes to increase cultural relevance for an individual recipient).  2. Cohort level: The intervention is modified for individuals grouped within the intervention setting into a treatment group, a class, or another type of cohort (e.g., a specific psychotherapy group, grade, or classroom).  3. Population-level: The intervention is modified for application to a particular cultural, ethnic, clinical, or social group (e.g., repetition of intervention components for all patients with cognitive impairments; development of culturally relevant vignettes to be used with all individuals of a particular ethnic identity).  4. Provider/facilitator level: Modifications are made by a clinician/facilitator for all of their participants (e.g., ‘I never set an agenda when I do cognitive therapy’).  5. Unit level: A modification is made by all of the facilitators in a unit (e.g., clinic/department/grade) within a larger organisation (e.g., ‘We can only do 60-minute intervention sessions instead of 90-minute sessions in our clinic’).  6. Hospital/Organisation level: Modifications are made by an entire organisation.  7. Network/Community level: Modifications are applied by an entire network or system of hospitals/ clinics/schools (e.g., a Veterans Affairs; school district) or community.  **Types of adaptations**  1. Tailoring/tweaking/refining: This code was assigned to any minor change to the intervention that leaves all of the major intervention principles and techniques intact while making the intervention more appropriate, applicable, or acceptable (e.g., modifying language, creating slightly different versions of handouts or homework assignments, cultural adaptations).  2. Adding elements (intervention modules or activities): Additional materials or activities are inserted that are consistent with the fundamentals of the intervention (e.g., adding role play exercises to a unit on assertiveness in a substance abuse prevention intervention).  3. Removing elements (removing/skipping intervention modules or components): Particular elements of the intervention are not included (e.g., leaving out a demonstration on condom use in an HIV prevention intervention for adolescents).  4. Shortening/condensing (pacing/timing): A shorter amount of time than prescribed is used to complete the intervention or intervention sessions (e.g., shorter spacing between sessions, or shortening sessions, offering fewer sessions, or going through particular modules or concepts more quickly without skipping material).  5. Lengthening/extending (pacing/timing): A longer amount of time than prescribed by the manual/ protocol is spent to complete intervention or intervention sessions (e.g., greater spacing between sessions, longer sessions, more sessions, or spending more time on one or more modules/activities or concepts).  6. Substituting elements: A module or activity is replaced with something that is different in substance (e.g., replacing a module on condoms with one on abstinence in an HIV prevention program).  7. Reordering elements: Modules/activities or concepts are completed in a different order from what is recommended in the manual/protocol. This code would not be applied if the protocol allows flexibility in the order in which specific modules or interventions occur.  8. Integrating another approach into the intervention: The intervention of interest is used as the starting point, but aspects of different therapeutic approaches or interventions are also used (e.g., integrating an ‘empty chair’ exercise into a ‘CBT for Depression’ treatment protocol). | | | |
