# Supplementary material for: Adaptation of an integrated Behavioural Activation and physical activity intervention for women with depression and type 2 diabetes mellitus in Pakistan
Source: Research Square preprint supplement (doi:10.21203/rs.3.rs-7480009/v1), 2025-10-03
Supplement: Supplementary file 3 [file a352d909ac4e79b6ae025ade.docx]

**Supplementary file 1: Demographic information of workshop participants**

**Demographic information of workshop 1 participants (n=21)**

| S.No. | Role | Age (years) | Gender | Education | Occupation/  speciality |
| --- | --- | --- | --- | --- | --- |
| 1 | Patient-participant | 51 | Male | Intermediate (12 years of education) | School Teacher |
| 2 | Patient-participant | 56 | Female | No formal education | Housewife |
| 3 | Patient-participant | 43 | Female | Master in Islamic Studies (16 years of education) | School Teacher |
| 4 | Patient-participant | 48 | Female | MPhil in English Literature (18 years of education) | Assistant Professor |
| 5 | Patient-participant | 50 | Female | Bachelor of Arts (14 years of education) | Housewife |
| 6 | Patient-participant | 59 | Male | Matric (10 years of education) | Business |
| 7 | Patient-participant | 48 | Female | Primary (5 years of education) | Tailoring in home |
| 8 | Healthcare staff | 33 | Female | MS in Nutrition Sciences (18 years of education) | Nutritionist |
| 9 | Healthcare staff | 36 | Male | MS in Public Health (18 years of education) | Public Health Specialist |
| 10 | Healthcare staff | 49 | Female | MS in Physical Therapy (18 years of education) | Physical Therapist |
| 11 | Healthcare staff | 43 | Male | MBBS, Fellow of College of Physicians and Surgeons (FCPS) | Psychiatrist |
| 12 | Healthcare staff | 30 | Female | MS in Clinical Psychology (18 years of education) | Psychologist |
| 14 | Healthcare staff | 35 | Male | MS in Nursing (18 years of education) | Nurse |
| 15 | Healthcare staff | 26 | Female | Doctor of Physical Therapy (17 years of education) | Physical Therapist |
| 16 | Healthcare staff | 40 | Male | MBBS, Fellow of College of Physicians and Surgeons (FCPS) | Diabetologist |
| 13 | Healthcare staff | 29 | Female | BS in Nutrition Sciences (16 years of education) | Nutritionist |
| 17 | Carer | 51 | Female | Matric (10 years of education) | Housewife |
| 18 | Carer | 24 | Male | BS Computer Science student | Student |
| 19 | Representative of public | 45 | Male | Matric (10 years of education) | Property dealer/ political leader |
| 20 | Social worker | 26 | Male | Bachelor of Arts (14 years of education) | Computer Operator |
| 21 | Social worker | 22 | Female | BS Sociology student | Student |

**Demographic information of workshop 2 participants (n=16)**

| S.No. | Role | Age (years) | Gender | Education | Occupation/  speciality |
| --- | --- | --- | --- | --- | --- |
| 1 | Patient-participant | 43 | Female | Master in Islamic Studies (16 years of education) | School Teacher |
| 2 | Patient-participant | 48 | Female | MPhil in English Literature (18 years of education) | Assistant Professor |
| 3 | Patient-participant | 50 | Female | Bachelor of Arts (14 years of education) | Housewife |
| 4 | Patient-participant | 48 | Female | Primary (5 years of education) | Tailoring in home |
| 5* | Patient-participant | 45 | Male | Bachelor of Arts (14 years of education) | Govt. employee (Clark) |
| 6* | Patient-participant | 41 | Female | Master in Home Economics (16 years of education) | Lecturer |
| 7 | Healthcare staff | 33 | Female | MS in Nutrition Sciences (18 years of education) | Nutritionist |
| 8 | Healthcare staff | 49 | Female | MS in Physical Therapy (18 years of education) | Physical Therapist |
| 9 | Healthcare staff | 30 | Female | MS in Clinical Psychology (18 years of education) | Psychologist |
| 10 | Healthcare staff | 35 | Male | MS in Nursing (18 years of education) | Nurse |
| 11 | Healthcare staff | 40 | Male | MBBS, Fellow of College of Physicians and Surgeons (FCPS) | Diabetologist |
| 12* | Healthcare staff | 42 | Male | MBBS (17 years of education) | Medical Officer |
| 13* | Healthcare staff | 35 | Female | BS Occupational therapy (16 years of education) | Occupational Therapist |
| 14 | Carer | 51 | Female | Matric (10 years of education) | Housewife |
| 15* | Carer | 58 | Male | Master in Urdu (16 years of education) | Retired Govt. employee |
| 16 | Social worker | 22 | Female | BS Sociology student | Student |
| *Participants 5,6,12,13 and 15 were not present in workshop 1. | | | | | |
